# Supplementary material for: Electrochemically engineered domain: nickel–hydroxide/nickel nitride composite for alkaline HER electrocatalysis
Source: Royal Society of Chemistry journal article supplement (doi:10.1039/d3ta06408e), 2023-12-07
Supplement: d3ta06408e1.pdf [file d3ta06408e1.pdf]

## Electronic Supplementary Information (ESI)

# Electrochemically Engineered Domain: Nickel– Hydroxide/Nickel Nitride Composite for Alkaline HER Electrocatalysis

Chikaodili E. Chukwunke,<sup>a</sup> Kenta Kawashima,<sup>a</sup> Hao Li,<sup>b</sup> Raul A. Marquez,<sup>a</sup> Yoon Jun Son,<sup>c</sup>  
Lettie A. Smith,<sup>a</sup> Hugo Celio,<sup>d</sup> Graeme Henkelmana,<sup>e,f,g</sup> and C. Buddie Mullins<sup>\*a,c,d,f,g</sup>

<sup>a</sup>*Department of Chemistry, College of Natural Sciences, The University of Texas at Austin, Austin, Texas 78712, United States*

<sup>b</sup>*Advanced Institute for Materials Research (WPI-AIMR), Tohoku University, Sendai 980-8577, Japan*

<sup>c</sup>*McKetta Department of Chemical Engineering, The University of Texas at Austin, Austin, Texas 78712, United States*

<sup>d</sup>*Texas Materials Institute, The University of Texas at Austin, Austin, Texas 78712, United States*

<sup>e</sup>*Oden Institute for Computational Engineering and Sciences, The University of Texas at Austin, Austin, Texas 78712, United States*

<sup>f</sup>*Center for Electrochemistry, The University of Texas at Austin, Austin, Texas 78712, United States*

<sup>g</sup>*H2@UT, The University of Texas at Austin, Austin, Texas 78712, United States*

*\*Corresponding author.*

---

E-mail address: mullins@che.utexas.edu

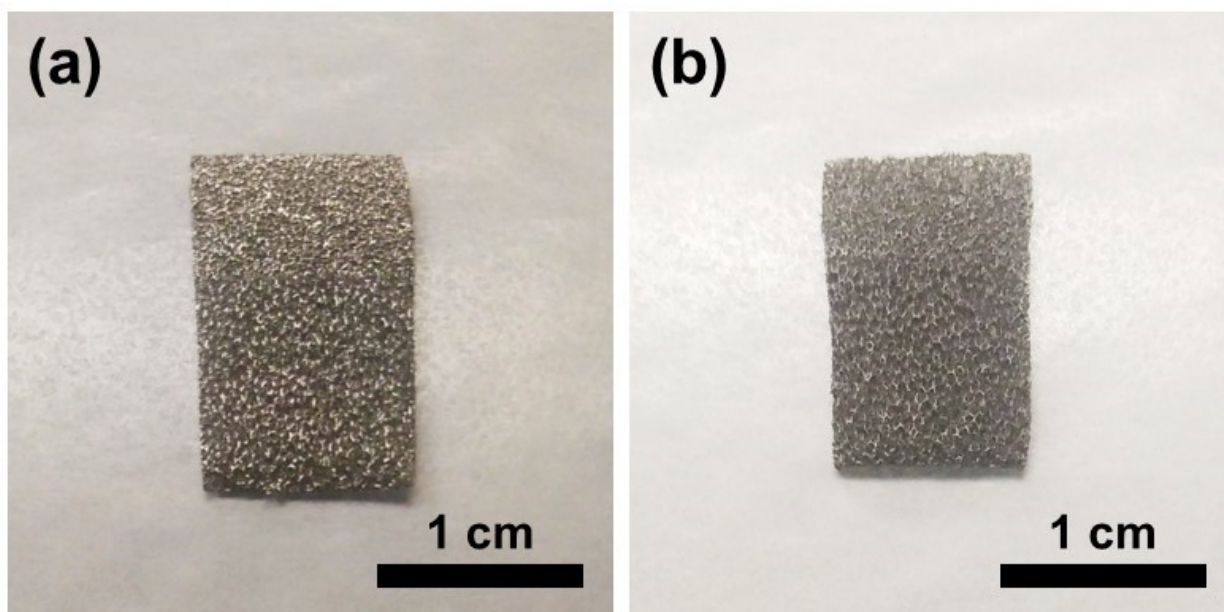

**Fig. S1** Digital photographs of pristine (a) NF and (b) Ni<sub>3</sub>N/NF.

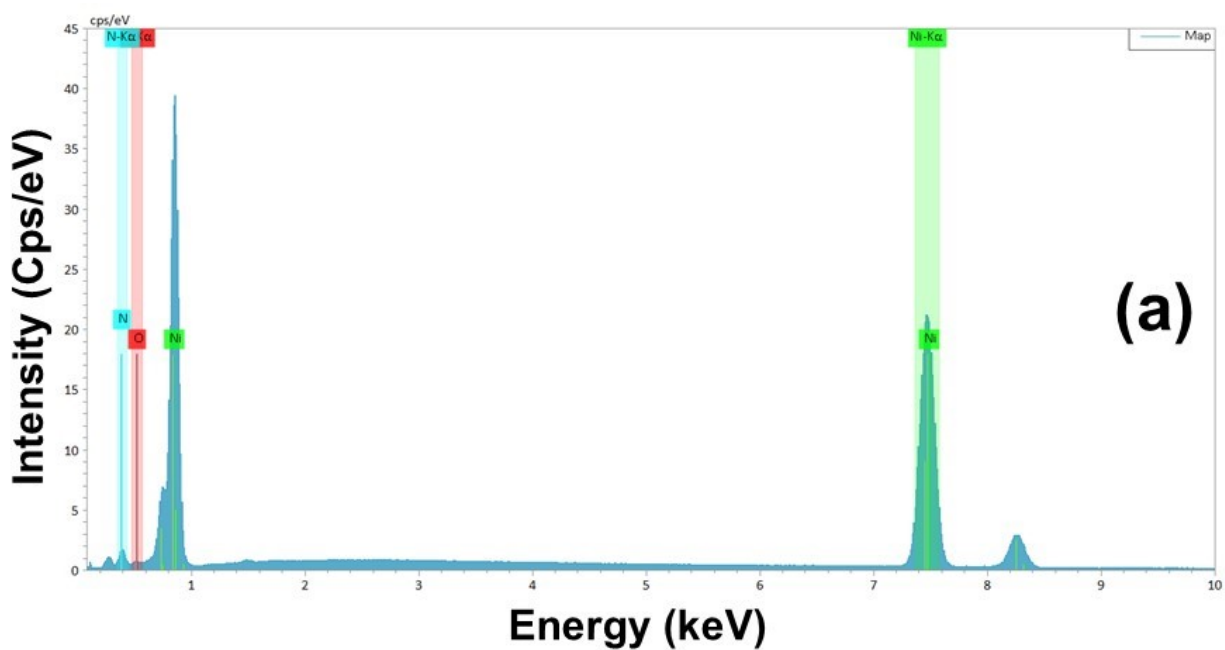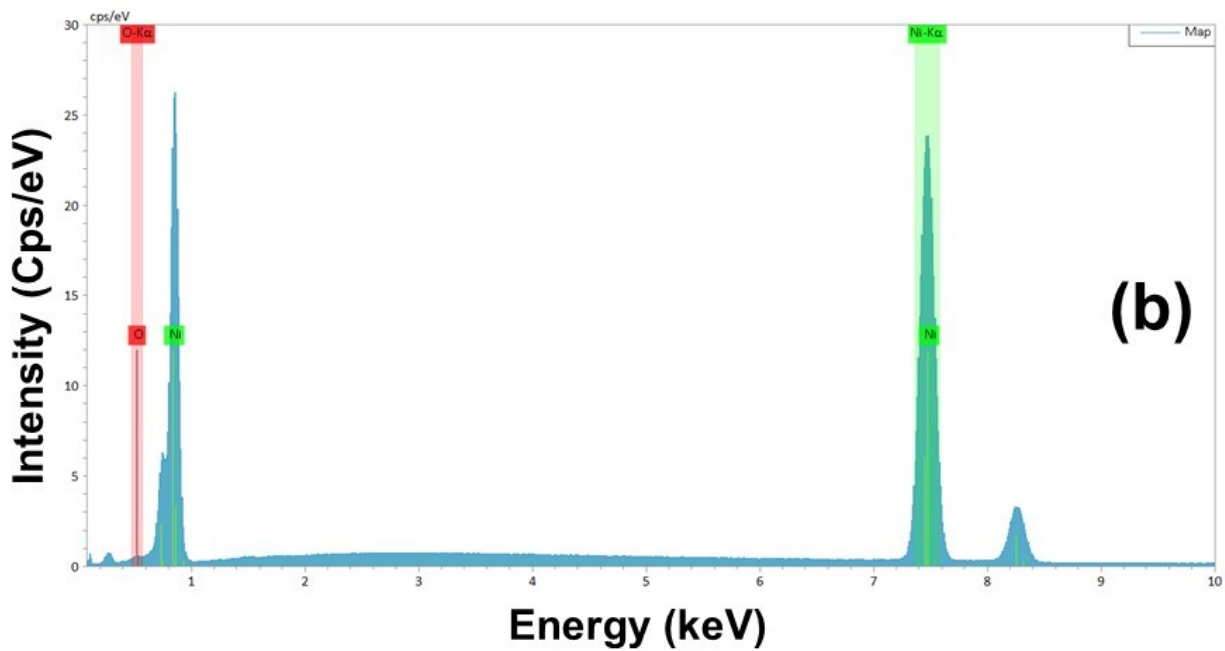

**Fig. S2** EDX spectra of pristine (a) Ni<sub>3</sub>N/NF and (b) NF.

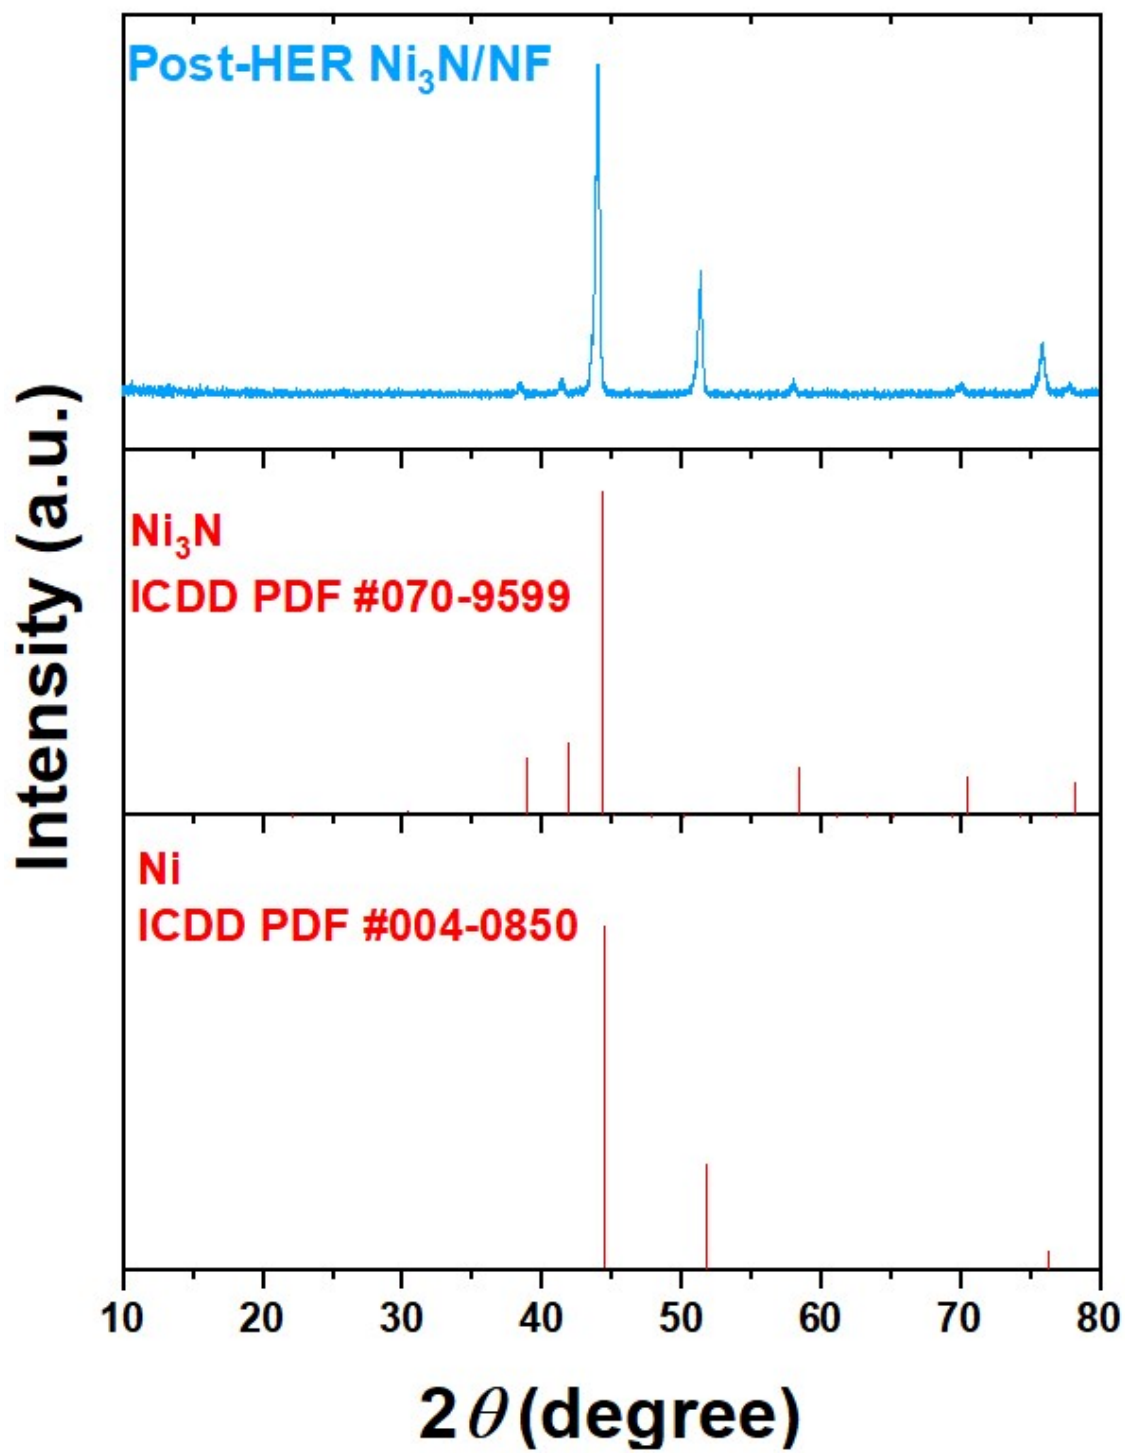

Fig. S3 XRD pattern of Ni<sub>3</sub>N/NF after long-term HER testing.

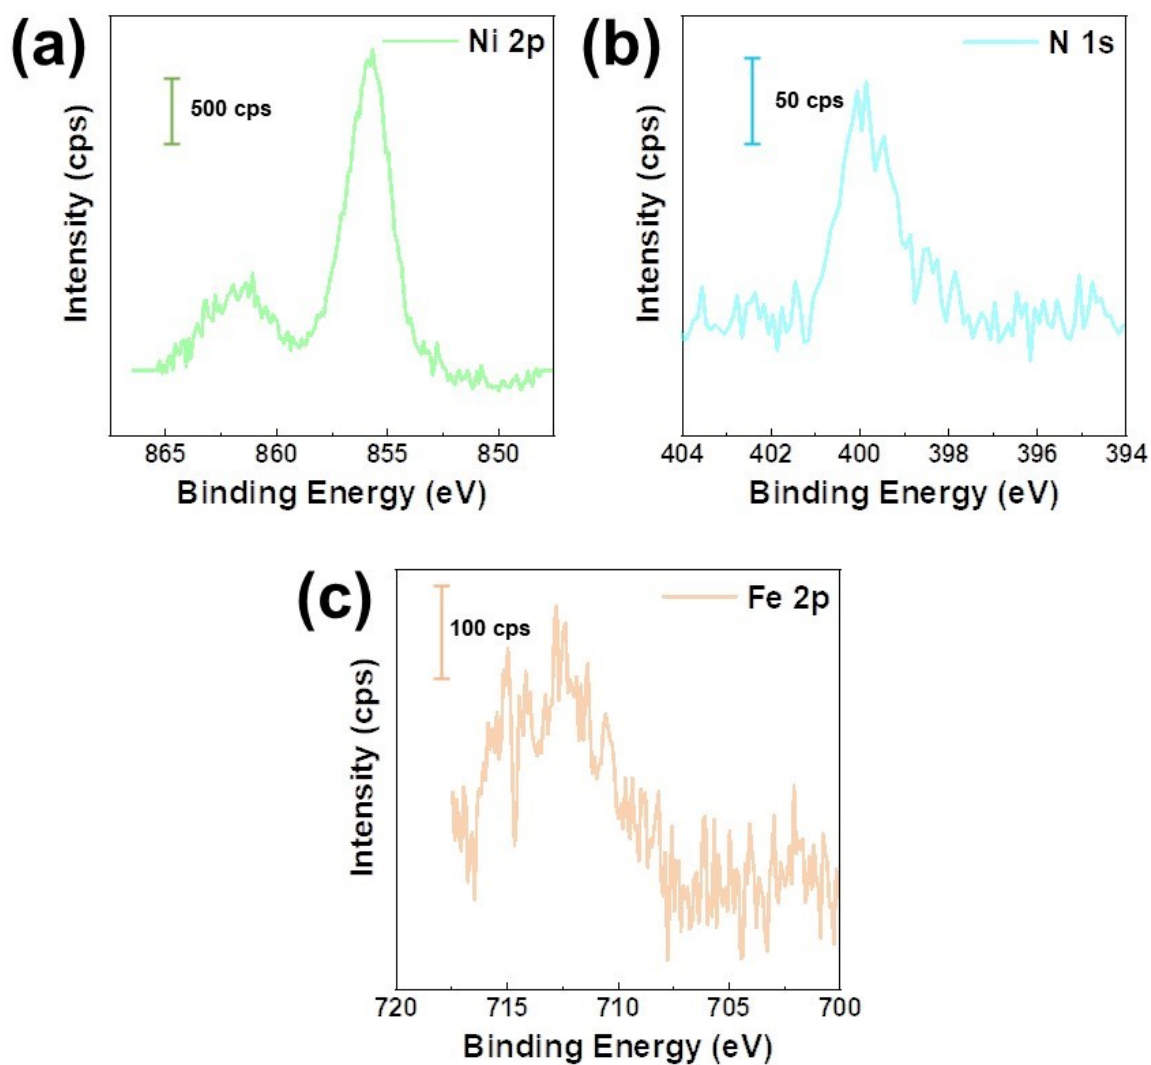

**Fig. S4** (a) Ni 2p, (b) N 1s, and (c) Fe 2p XPS spectra of  $\text{Ni}_3\text{N}/\text{NF}$  after long-term HER testing.

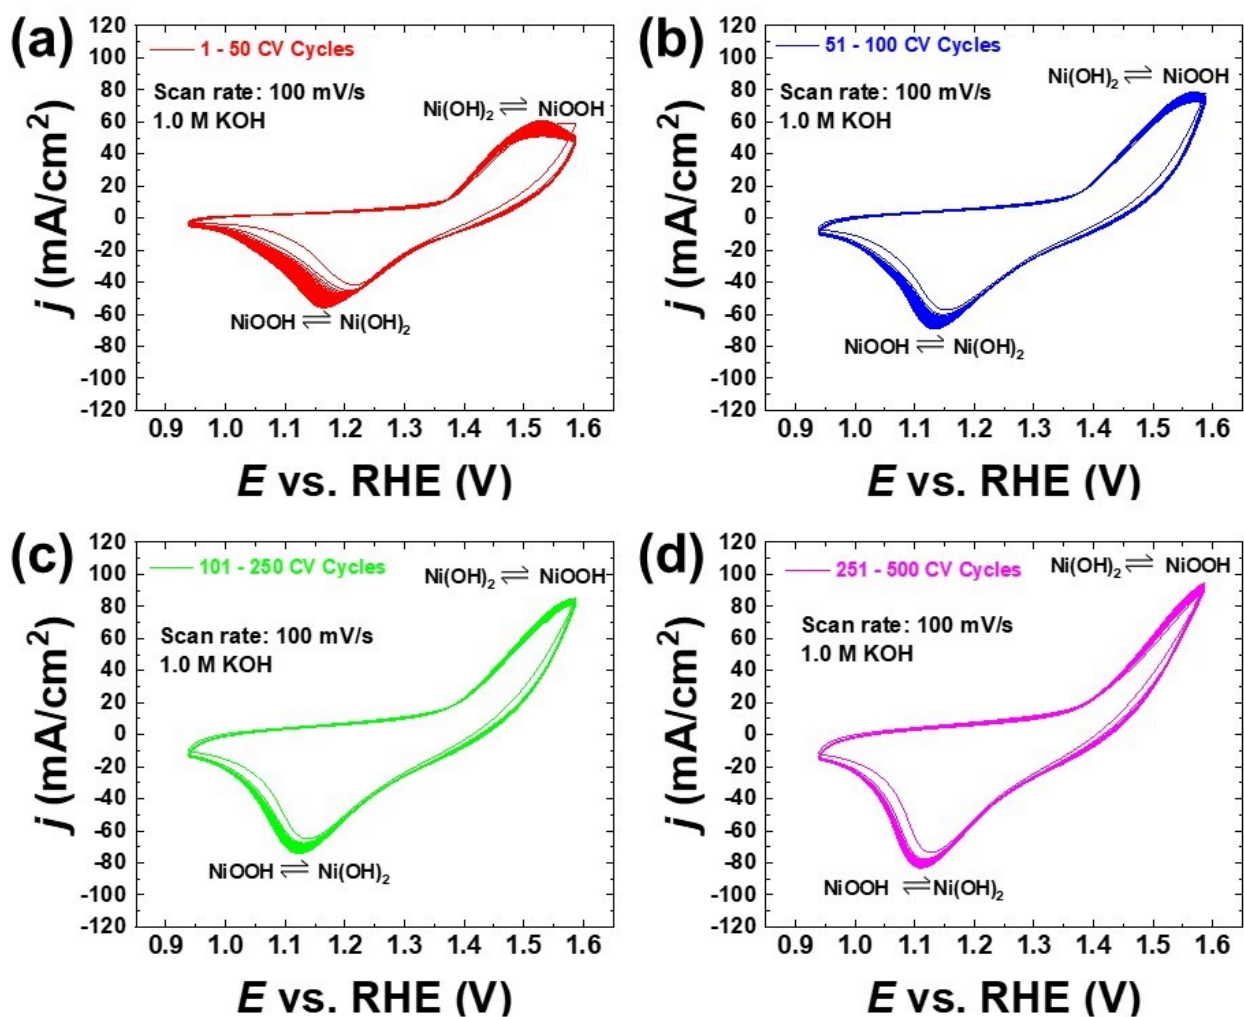

**Fig. S5** CV activation plots for  $\text{Ni}_3\text{N}/\text{NF}$ : (a) 1-50 CV cycles, (b) 51-100 CV cycles, (c) 101-250 CV cycles, and (d) 251-500 CV cycles.

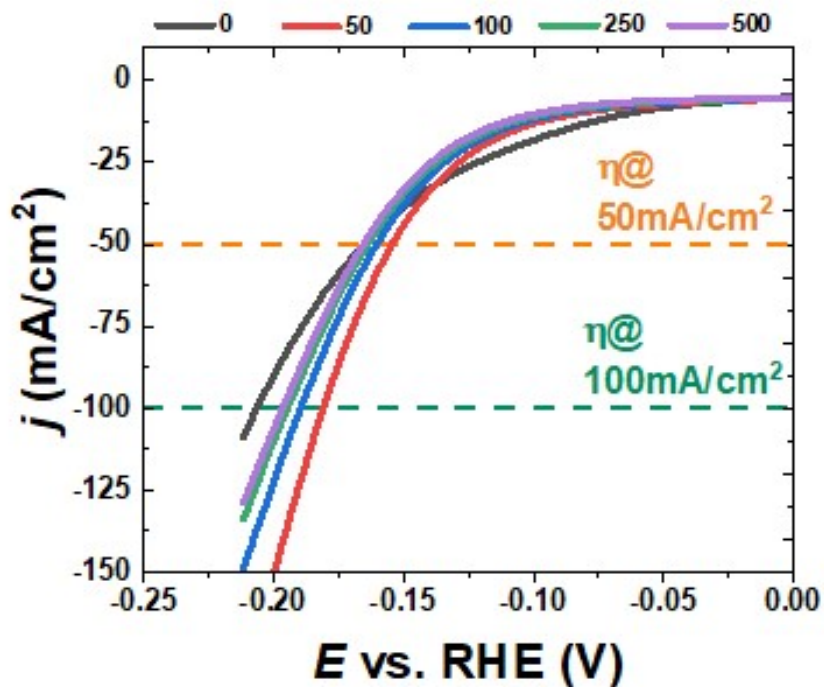

**Fig. S6** LSV curves of Ni<sub>3</sub>N/NF after CV activation with different cycle numbers: 0-500 cycles.

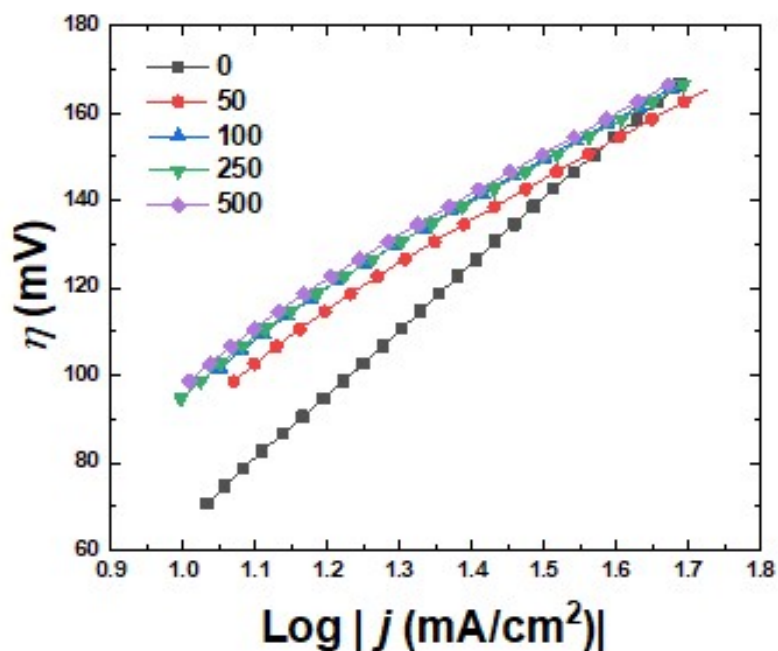

**Fig. S7** Tafel slopes of Ni<sub>3</sub>N/NF after CV activation with different cycle numbers: 0-500 cycles.

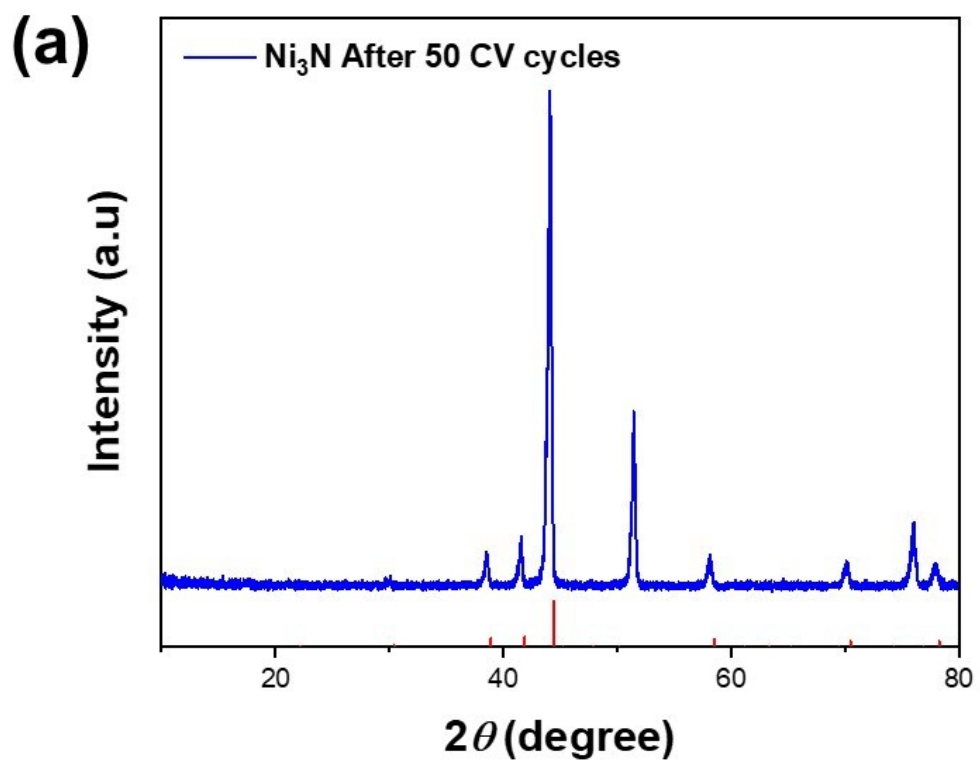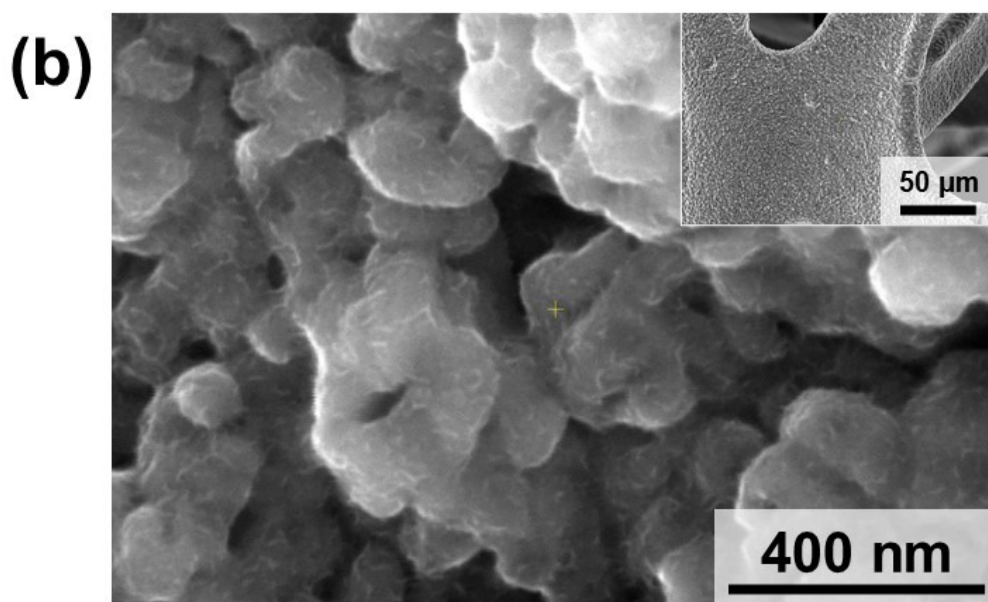

**Fig. S8** (a) XRD pattern and (b) SEM images of 50 CV-activated  $\text{Ni}_3\text{N}/\text{NF}$ .



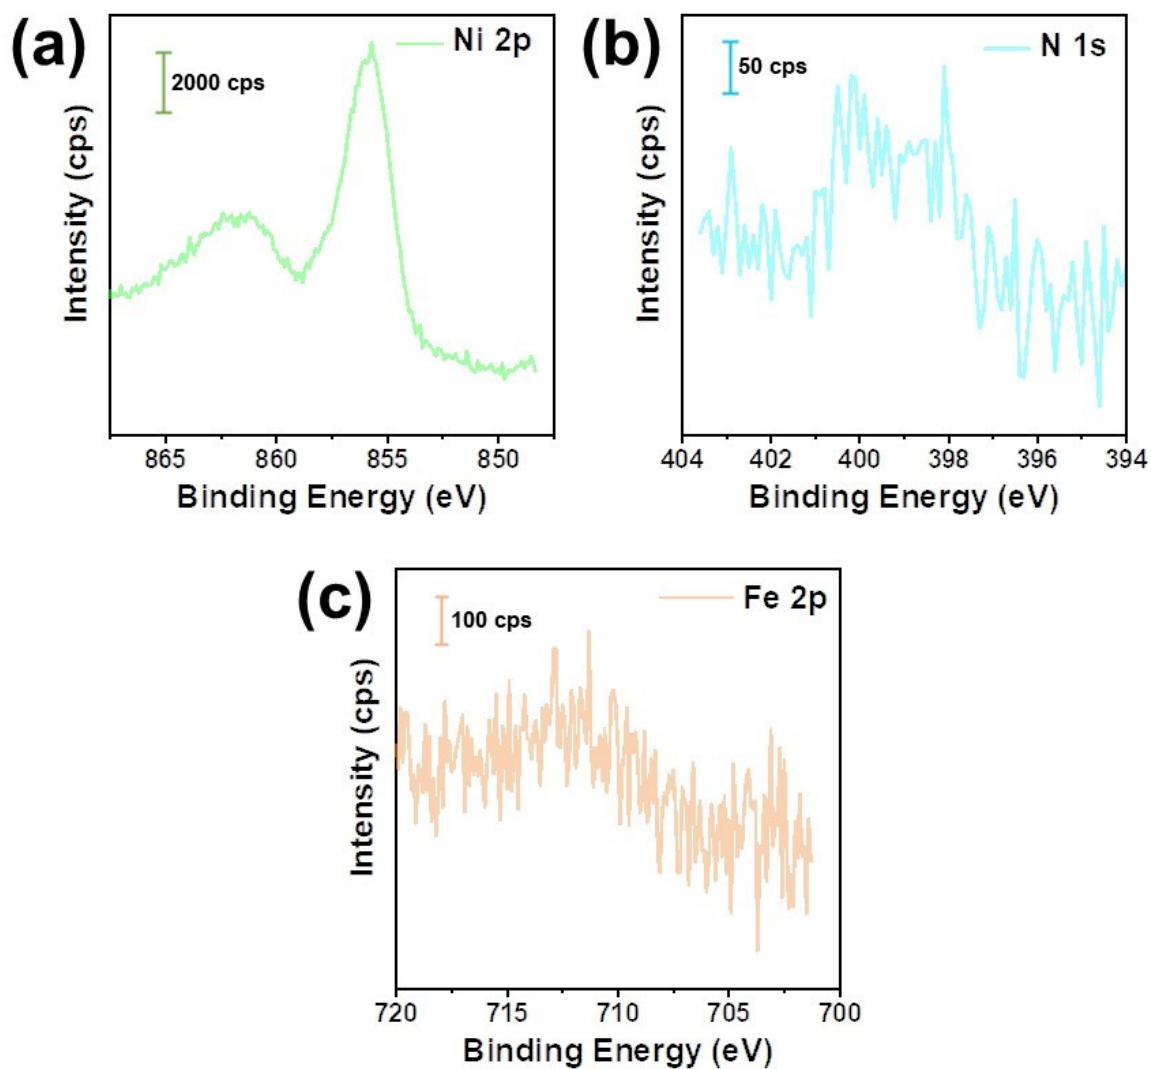

**Fig. S9** (a) Ni 2p, (b) N 1s, and (c) Fe 2p XPS spectra of 50 CV-activated Ni<sub>3</sub>N/NF.

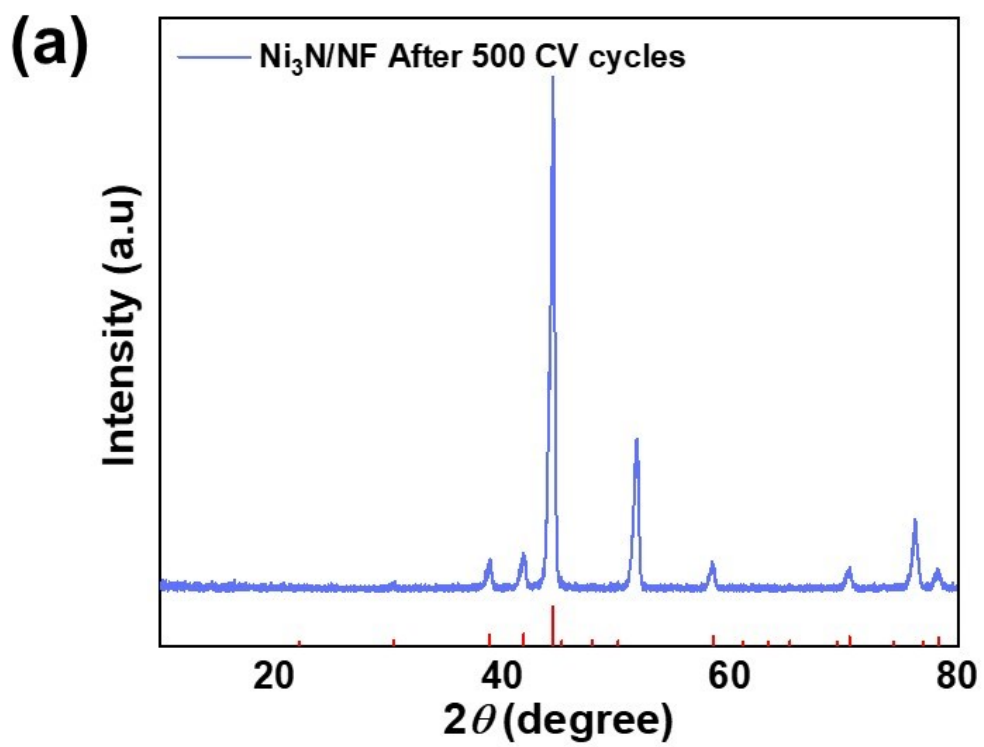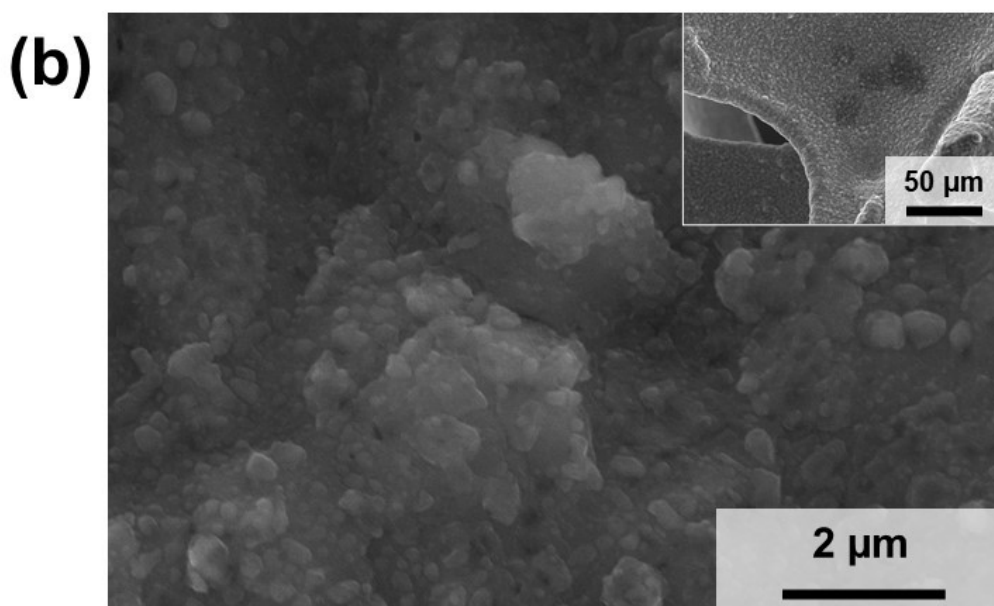

**Fig. S10** (a) XRD pattern and (b) SEM images of 500 CV-activated  $\text{Ni}_3\text{N/NF}$ .

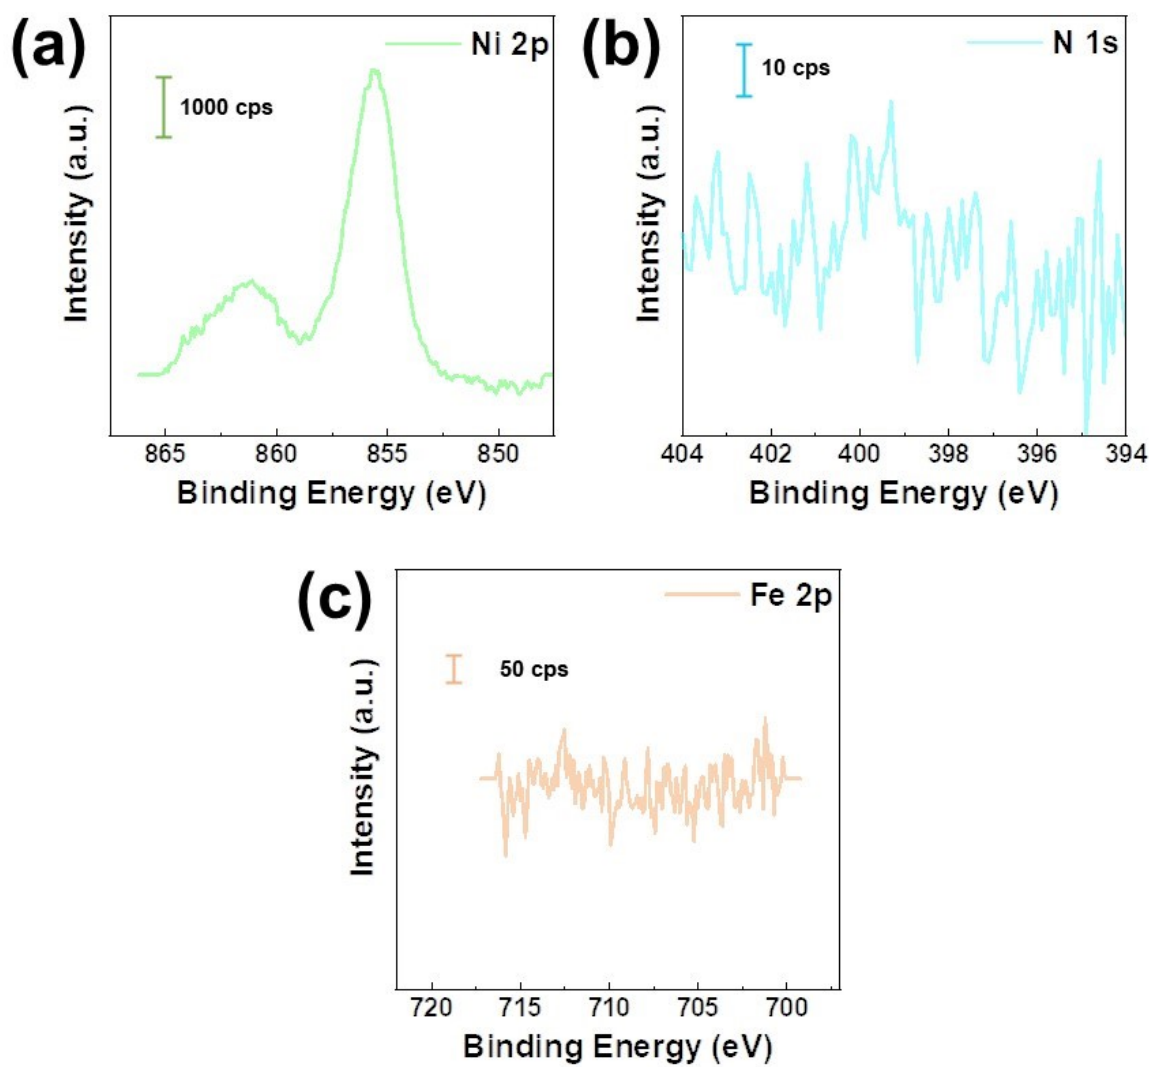

**Fig. S11** (a) Ni 2p, (b) N 1s, and (c) Fe 2p XPS spectra of 500 CV-activated Ni<sub>3</sub>N/NF.

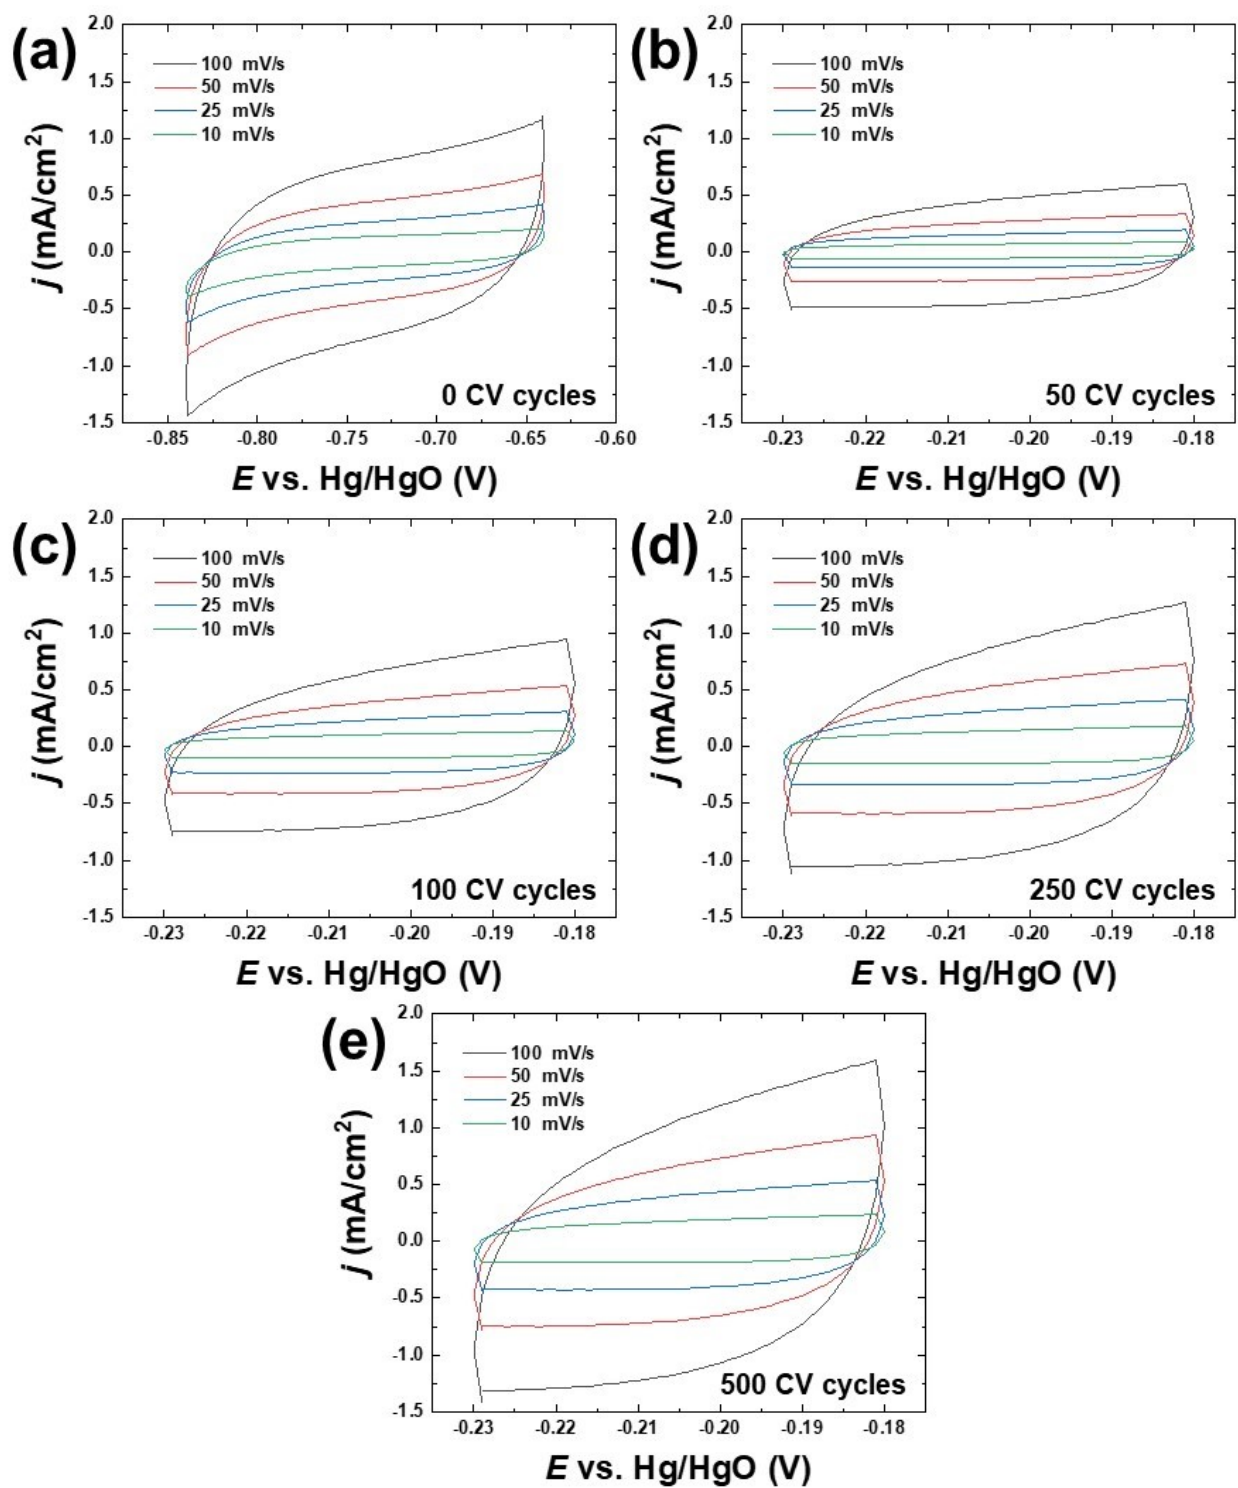

**Fig. S12** Non-faradaic CV curves of (a) 0, (b) 50, (c) 100, (d) 250, and (e) 500 CV-activated Ni<sub>3</sub>N/NF samples.

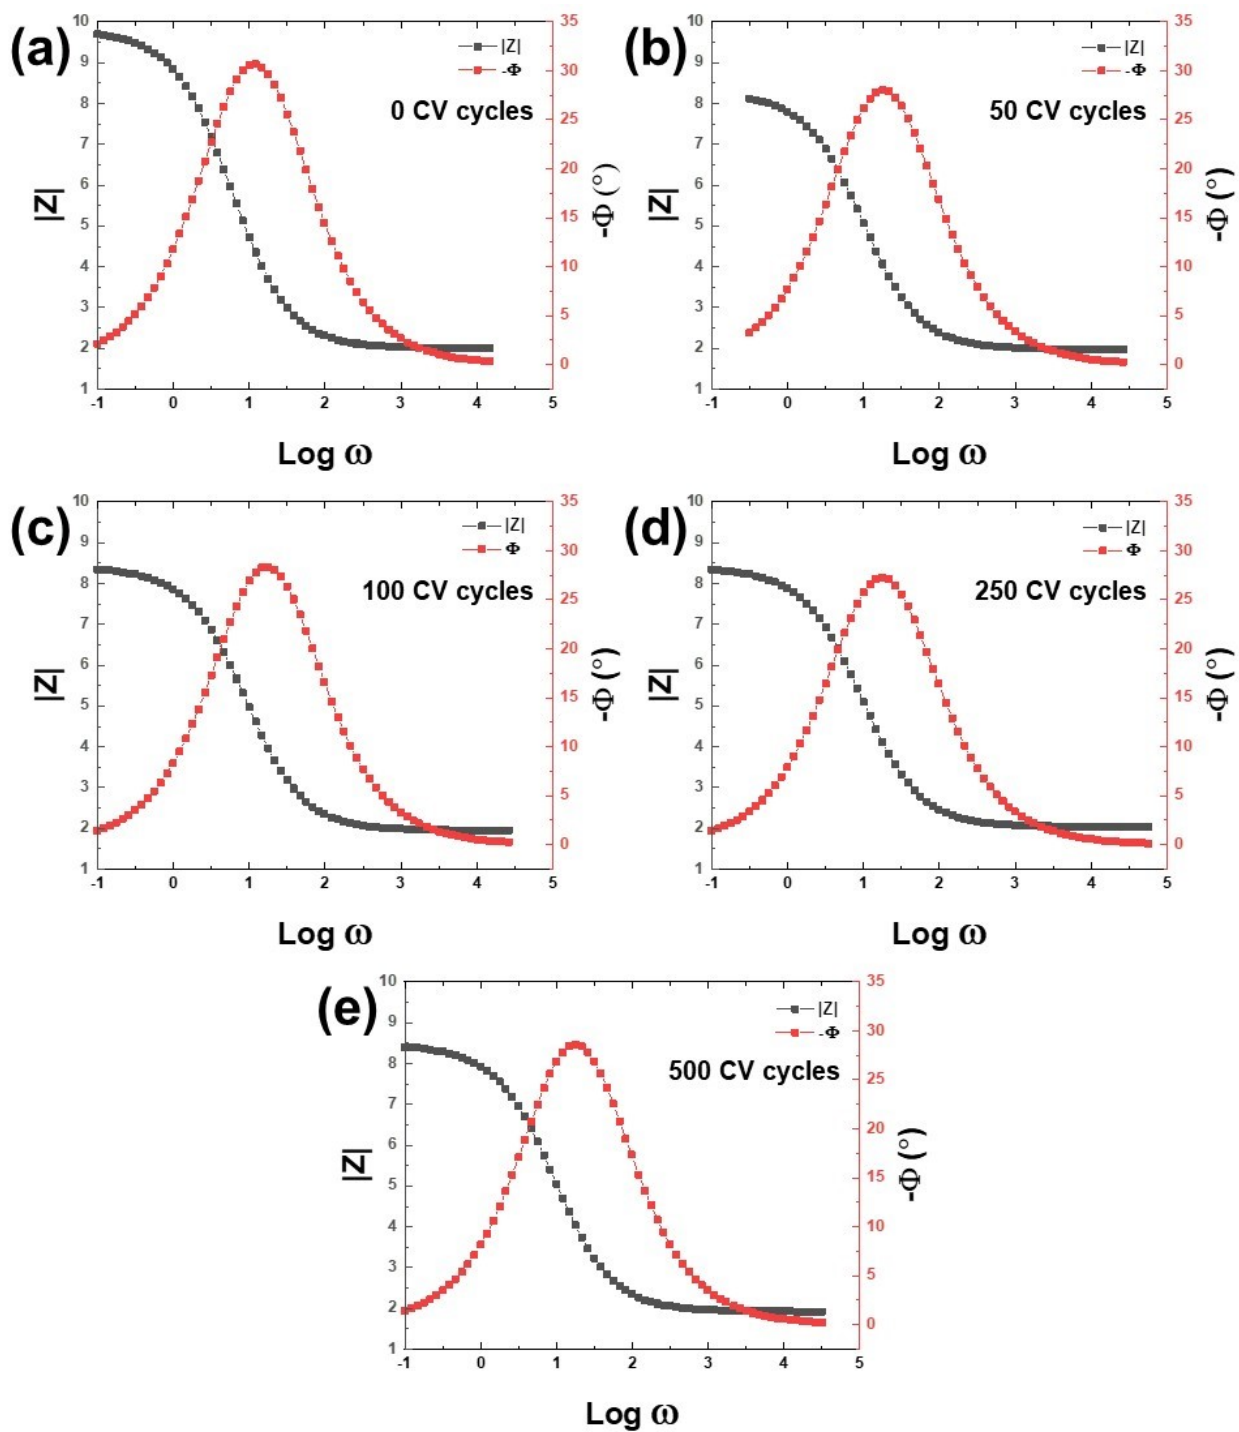

**Fig. S13** Bode plots of (a) 0, (b) 50, (c) 100, (d) 250, and (e) 500 CV-activated  $\text{Ni}_3\text{N}/\text{NF}$  samples.

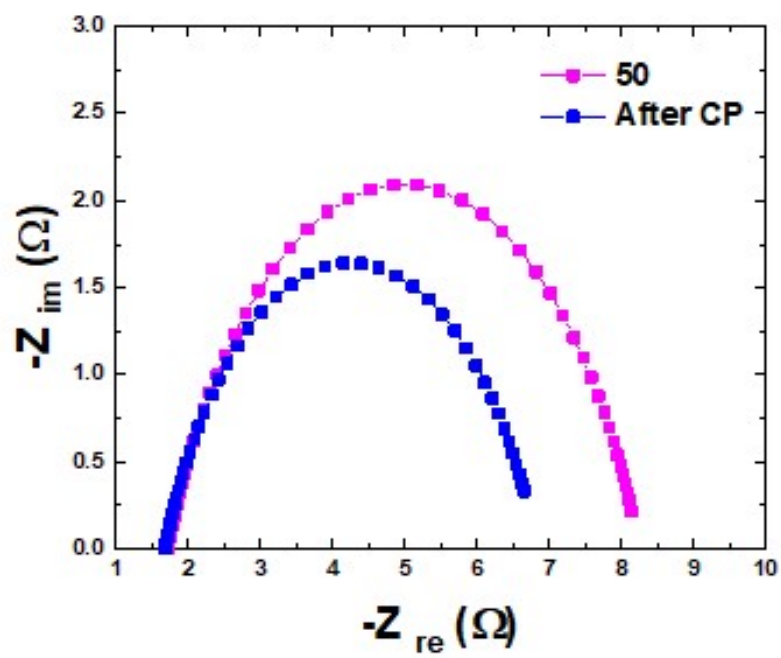

**Fig. S14** Nyquist plots for 50 CV-activated  $Ni_3N/NF$  before and after long-term HER testing.

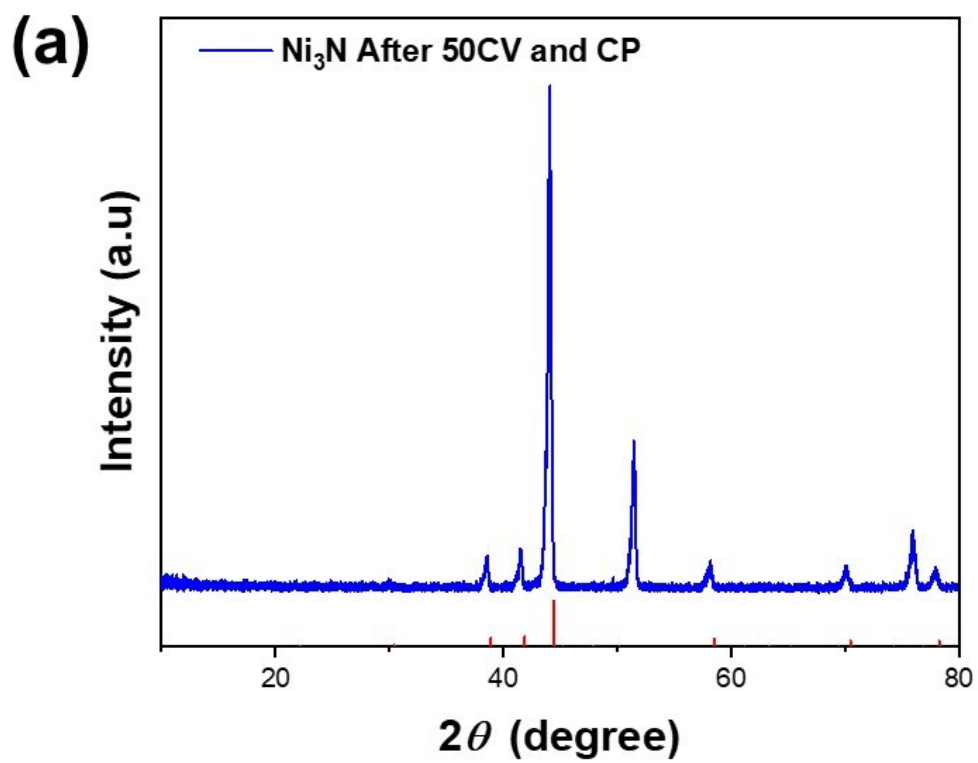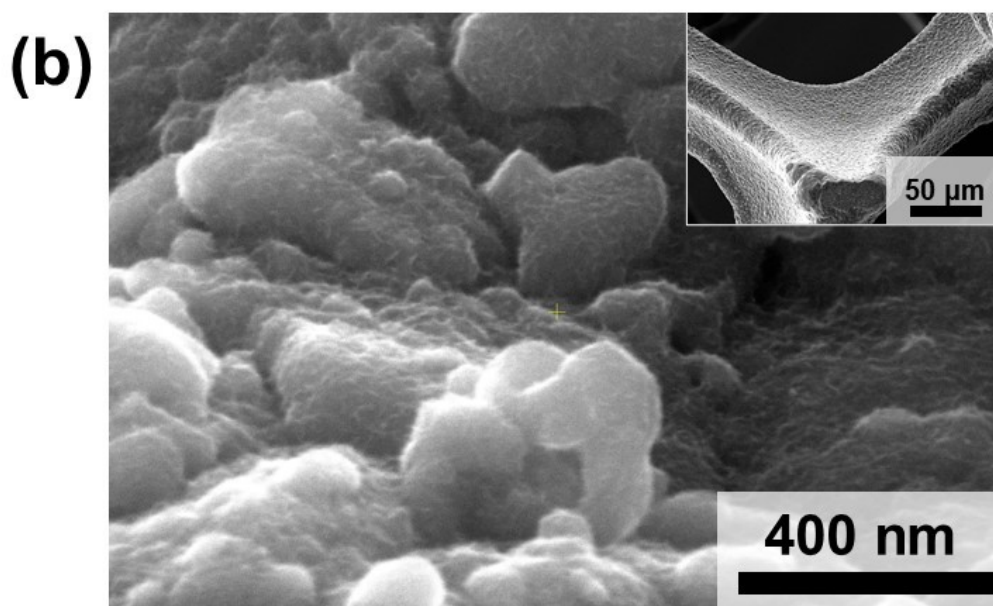

**Fig. S15** (a) XRD pattern and (b) SEM images of 50 CV-activated  $\text{Ni}_3\text{N}/\text{NF}$  after long-term HER testing.



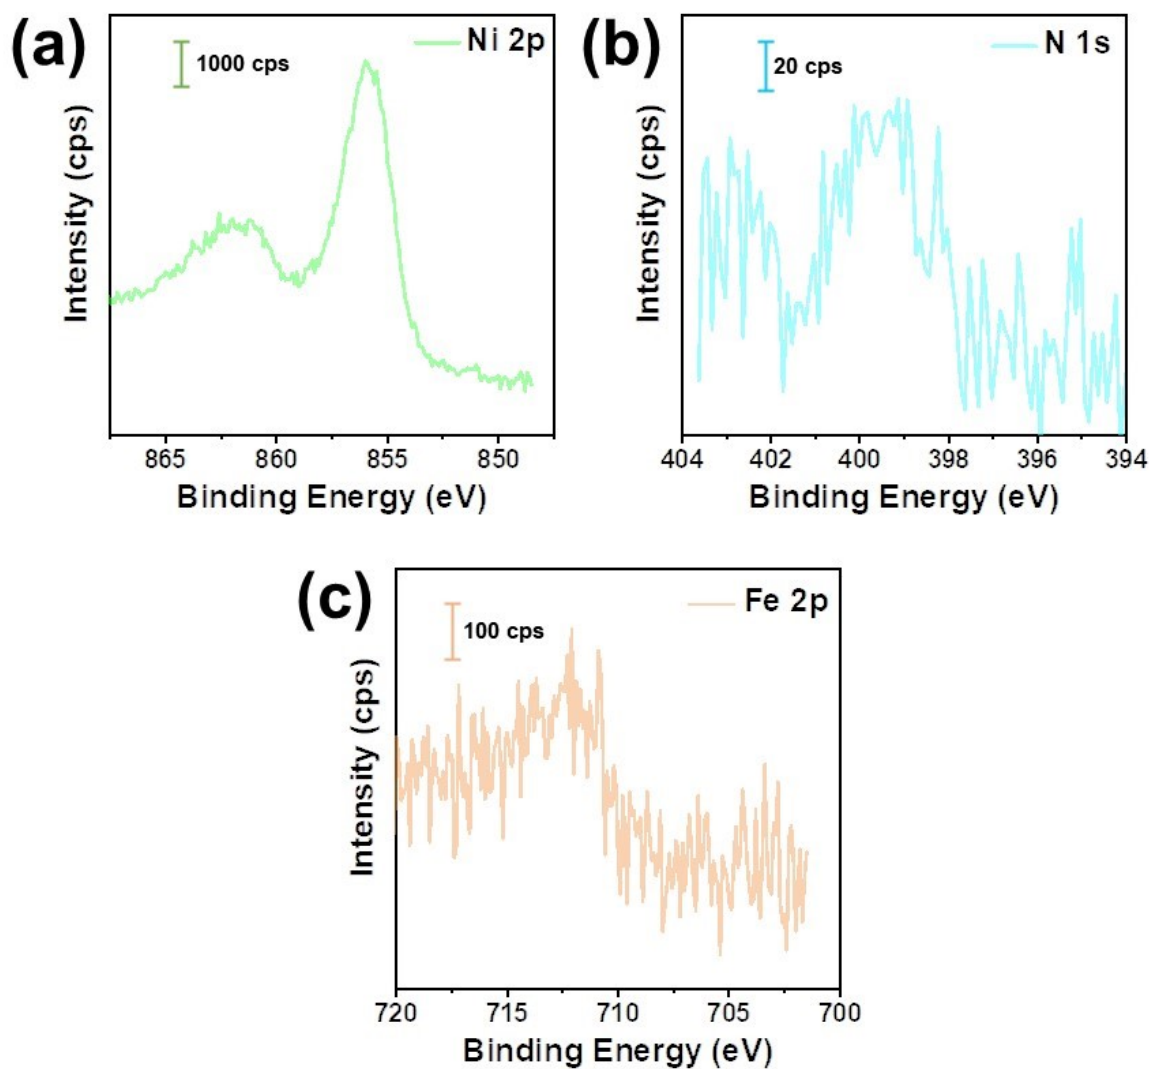

**Fig. S16** (a) Ni 2p, (b) N 1s, and (c) Fe 2p XPS spectra of 50 CV-activated Ni<sub>3</sub>N/NF after long-term HER testing.



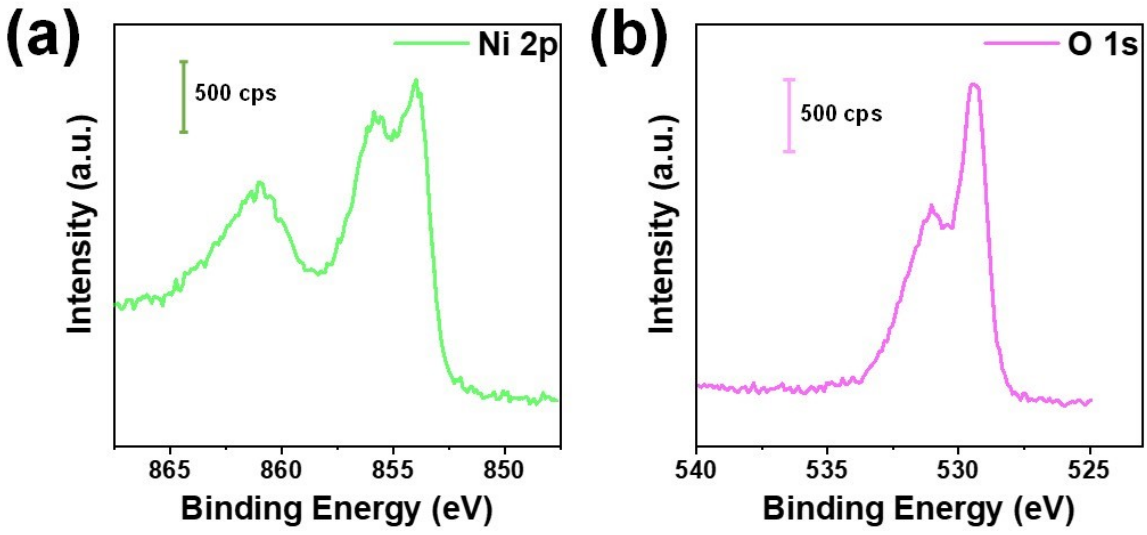

Fig. S17 (a) Ni 2p and (b) O 1s XPS spectra of NiO/NF.

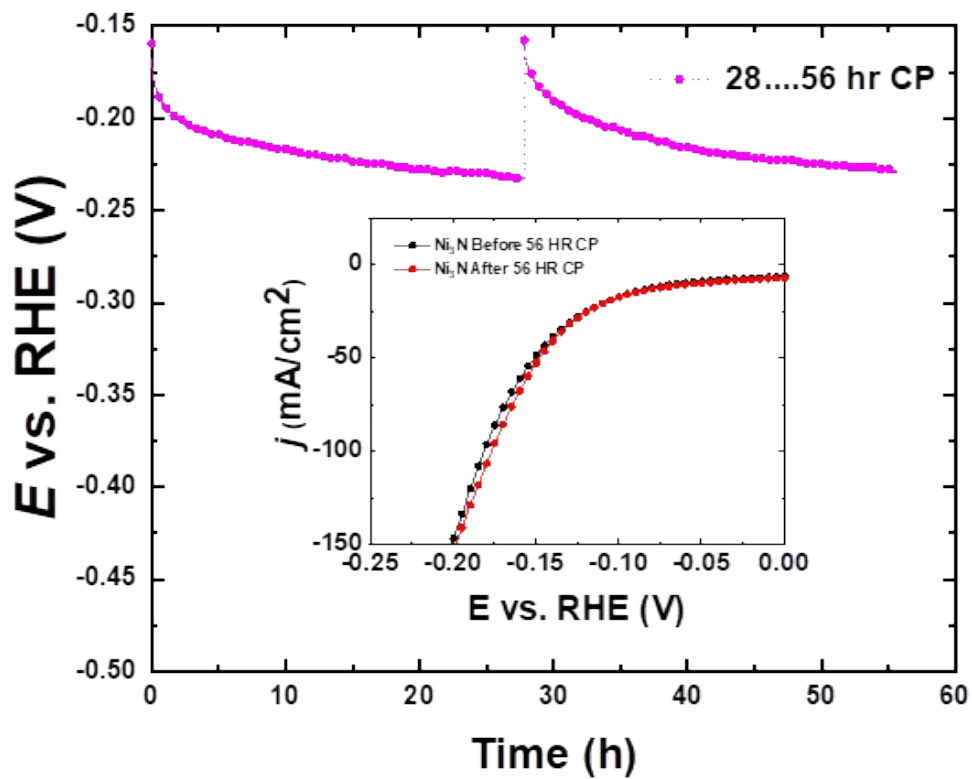

**Fig. S18** ~56 h HER chronopotentiometry tests at  $-20 \text{ mA/cm}^2$  for  $\text{Ni(OH)}_2\text{-Ni}_3\text{N/NF}$  and LSV curves before and after the chronopotentiometry (inset).

**Table S1** An alkaline HER activity comparison (at a cathodic current density of 50 mA/cm<sup>2</sup>) of pristine Ni<sub>3</sub>N/NF and electrochemically engineered Ni(OH)<sub>2</sub>-Ni<sub>3</sub>N/NF (after 50 CV cycles) in this work with previously reported similar electrocatalysts

| This work pristine Ni <sub>3</sub> N $\eta@50 \text{ mA/cm}^2 = 171.93 \pm 3.8 \text{ mV}$<br>After 50 CV cycles $\eta@50 \text{ mA/cm}^2 = 164 \pm 1.2 \text{ mV}$ |                                        |           |
|---------------------------------------------------------------------------------------------------------------------------------------------------------------------|----------------------------------------|-----------|
| Sample Name                                                                                                                                                         | $\eta@50 \text{ mA/cm}^2 \text{ (mV)}$ | Reference |
| Ni <sub>3</sub> N/NF                                                                                                                                                | ~210                                   | 1         |
| Ni <sub>3</sub> N/NF                                                                                                                                                | ~220                                   | 2         |
| Ni <sub>3</sub> N <sub>1-x</sub> /NF                                                                                                                                | ~240                                   | 3         |
| Ni <sub>3</sub> N/NF                                                                                                                                                | ~200                                   | 4         |
| Ni-S/NF                                                                                                                                                             | ~350                                   | 5         |
| Ni-S-OH/NF                                                                                                                                                          | ~270                                   | 5         |
| Ni <sub>3</sub> N                                                                                                                                                   | ~300                                   | 6         |
| Ni <sub>3</sub> N/NF                                                                                                                                                | ~210                                   | 7         |

**Table S2** A alkaline HER activity comparison (at a cathodic current density of 100 mA/cm<sup>2</sup>) of pristine Ni<sub>3</sub>N/NF and electrochemically engineered Ni(OH)<sub>2</sub>-Ni<sub>3</sub>N/NF (after 50 CV cycles) in this work with previously reported similar electrocatalysts

| This work pristine Ni <sub>3</sub> N $\eta@100 \text{ mA/cm}^2 = 207.27 \pm 3.06 \text{ mV}$<br>After 50 CV cycles $\eta@100 \text{ mA/cm}^2 = 192.27 \pm 1.53 \text{ mV}$ |                                         |           |
|----------------------------------------------------------------------------------------------------------------------------------------------------------------------------|-----------------------------------------|-----------|
| Sample Name                                                                                                                                                                | $\eta@100 \text{ mA/cm}^2 \text{ (mV)}$ | Reference |
| Ni <sub>3</sub> N/NF                                                                                                                                                       | ~300                                    | 1         |
| Ni <sub>3</sub> N/NF                                                                                                                                                       | ~250                                    | 2         |
| Ni <sub>3</sub> N <sub>1-x</sub> /NF                                                                                                                                       | ~350                                    | 3         |
| Ni <sub>3</sub> N/NF                                                                                                                                                       | ~300                                    | 7         |
| Ni-S/NF                                                                                                                                                                    | ~410                                    | 5         |
| Ni-S-OH/NF                                                                                                                                                                 | ~310                                    | 5         |
| Ni <sub>3</sub> N                                                                                                                                                          | ~350                                    | 6         |

## References

- (1) Shalom, M.; Ressnig, D.; Yang, X.; Clavel, G.; Patrick Fellingner, T.; Antonietti, M. Nickel Nitride as an Efficient Electrocatalyst for Water Splitting. *J. Mater. Chem. A* **2015**, *3* (15), 8171–8177. <https://doi.org/10.1039/C5TA00078E>.
- (2) Xing, Z.; Li, Q.; Wang, D.; Yang, X.; Sun, X. Self-Supported Nickel Nitride as an Efficient High-Performance Three-Dimensional Cathode for the Alkaline Hydrogen Evolution Reaction. *Electrochimica Acta* **2016**, *191*, 841–845. <https://doi.org/10.1016/j.electacta.2015.12.174>.
- (3) Liu, B.; He, B.; Peng, H.-Q.; Zhao, Y.; Cheng, J.; Xia, J.; Shen, J.; Ng, T.-W.; Meng, X.; Lee, C.-S.; Zhang, W. Unconventional Nickel Nitride Enriched with Nitrogen Vacancies as a High-Efficiency Electrocatalyst for Hydrogen Evolution. *Adv. Sci.* **2018**, *5* (8), 1800406. <https://doi.org/10.1002/adv.201800406>.
- (4) Liu, W.; Xia, T.; Ye, Y.; Wang, H.; Fang, Z.; Du, Z.; Hou, X. Self-Supported Ni<sub>3</sub>N Nanoarray as an Efficient Nonnoble-Metal Catalyst for Alkaline Hydrogen Evolution Reaction. *Int. J. Hydrog. Energy* **2021**, *46* (53), 27037–27043. <https://doi.org/10.1016/j.ijhydene.2021.05.188>.
- (5) Anantharaj, S.; Sugime, H.; Noda, S. Surface Amorphized Nickel Hydroxy Sulphide for Efficient Hydrogen Evolution Reaction in Alkaline Medium. *Chem. Eng. J.* **2021**, *408*, 127275. <https://doi.org/10.1016/j.cej.2020.127275>.
- (6) Jiang, M.; Li, Y.; Lu, Z.; Sun, X.; Duan, X. Binary Nickel–Iron Nitride Nanoarrays as Bifunctional Electrocatalysts for Overall Water Splitting. *Inorg. Chem. Front.* **2016**, *3* (5), 630–634. <https://doi.org/10.1039/C5QI00232J>.
- (7) Hu, S.; Feng, C.; Wang, S.; Liu, J.; Wu, H.; Zhang, L.; Zhang, J. Ni<sub>3</sub>N/NF as Bifunctional Catalysts for Both Hydrogen Generation and Urea Decomposition. *ACS Appl. Mater. Interfaces* **2019**, *11* (14), 13168–13175. <https://doi.org/10.1021/acsami.8b19052>.
